# Supplementary material for: Gold loaded titanium dioxide–carbon nanotube composites as active photocatalysts for cyclohexane oxidation at ambient conditions
Source: Royal Society of Chemistry journal article supplement (doi:10.1039/c5ra05253j), 2015-01-01

## Gold Loaded Titanium Dioxides-Carbon Nanotubes Composites as Active Photocatalysts for Cyclohexane Oxidation at Ambient Conditions

Mohamed Mokhtar Mohamed †,\*

† Benha University, Faculty of Science, Chemistry Department, Benha, Egypt

Figure S1: FTIR Spectra of MWCNT and MWCNT-TNT catalysts

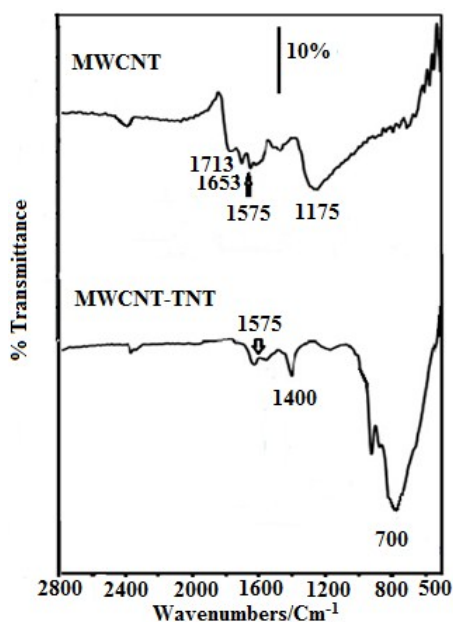

Figure S2: Effect of reactive intermediates (isopropanol, IPA; p-benzoquinone, BQ; triethanolamine, TEOA) on the activity of Au/TNT-MWCNT towards cyclohexane oxidation. Reaction conditions were done with 0.05 g of catalyst, 10 mmol cyclohexane, 10 mmol H<sub>2</sub>O<sub>2</sub>, 10 mL of acetonitrile, photoirradiation time, 12 h (>256 nm).

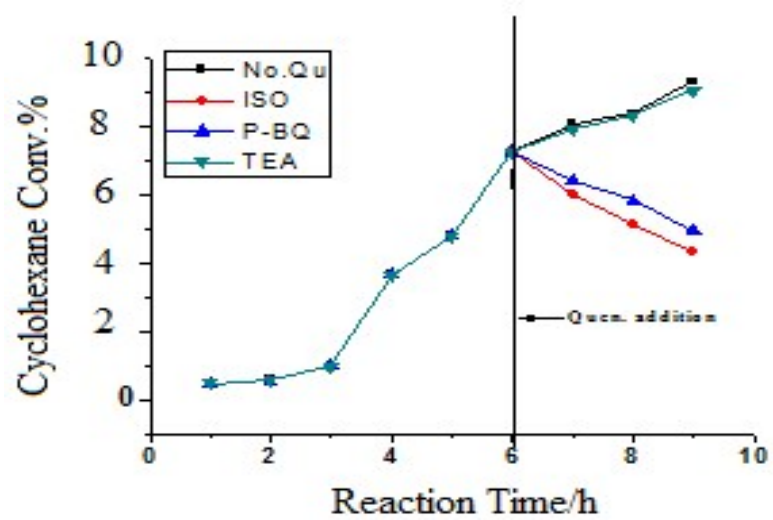

Supplement: c5ra05253j1.pdf [file c5ra05253j1.pdf]
